# Supplementary material for: Highly Selective Fluorescent Probe for the Detection of Copper (II) and Its Application in Live Cell Imaging
Source: Hindawi journal article supplement (doi:10.1155/2019/8130767), 2019-05-19
Supplement: f1 [file 8130767.f1.pdf]

# **Supporting Information**

## **Highly Selective Fluorescent Probe for the Detection of Copper (II)**

### **and Its Application in Live Cell Imaging**

Zhihao Guo#, Xiuji Wang#, Pei Wei, Yihua Gao\*, Qin Li

Analysis Center, Guangdong Medical University, Dongguan, 523808, P. R. China

#These authors contributed equally to this work

\*Corresponding author, Tel.: +86 76922896078; E-mail: gaoyh@gdmu.edu.cn

## 1. Structure characterization

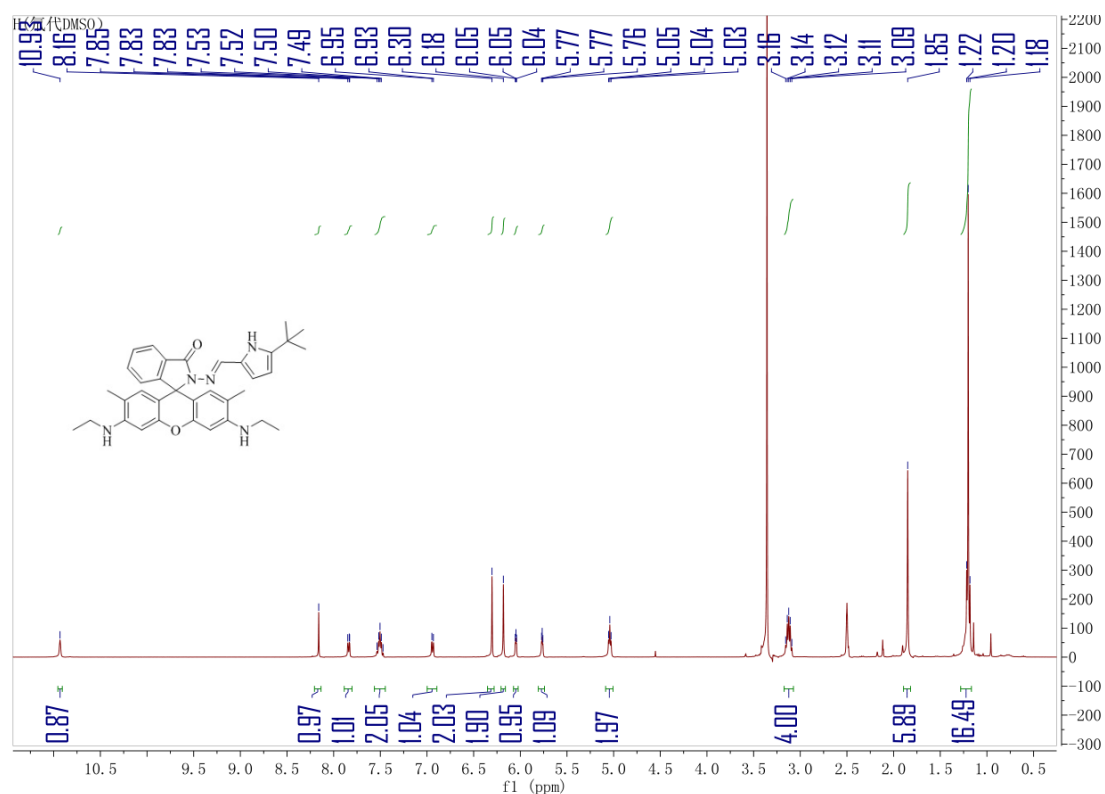

**Figure S1** <sup>1</sup>H NMR of compound **L1** (600 MHz, DMSO-d<sub>6</sub>).

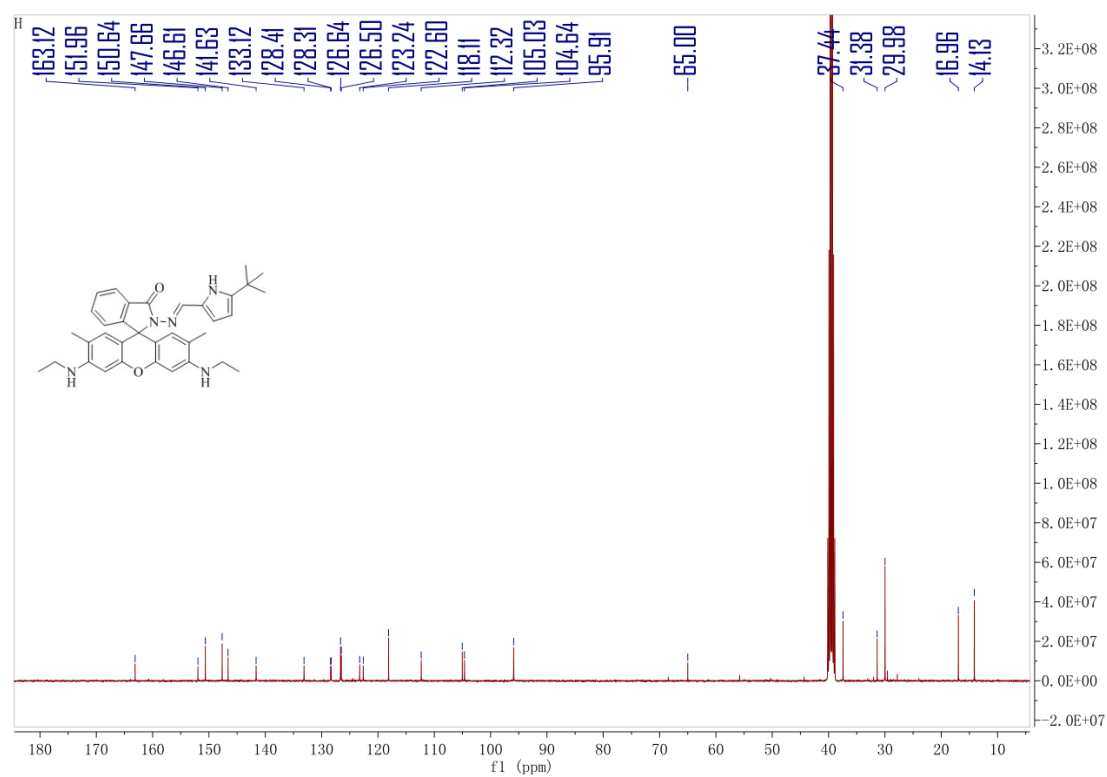

**Figure S2** <sup>13</sup>C NMR of compound **L1** (150 MHz, DMSO-d<sub>6</sub>).

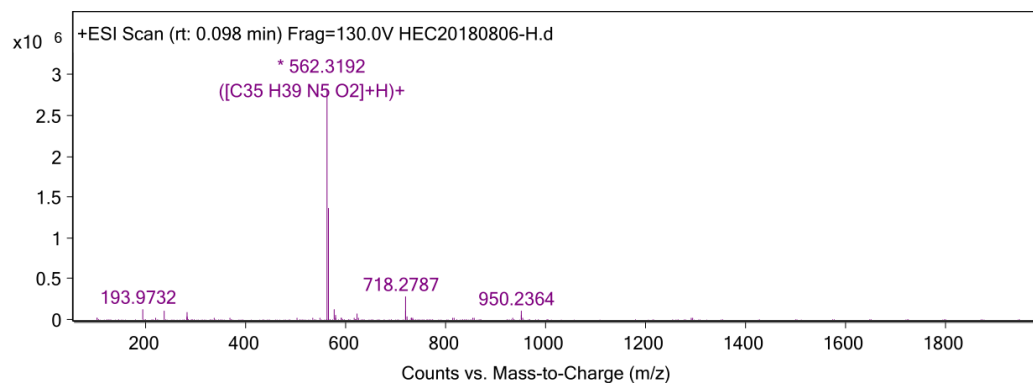

**Figure S3** High resolution mass spectra of **L1**.

## 2. Additional spectrum

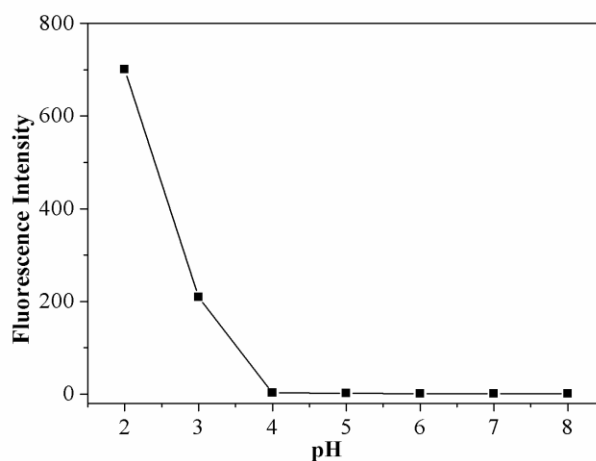

**Figure S4** Effect of pH on fluorescence intensity at 545 nm of **L1** (10  $\mu$ M) in  $\text{CH}_3\text{CN}/\text{H}_2\text{O}$  solution (1:1, v/v). Excitation was performed at 500 nm.

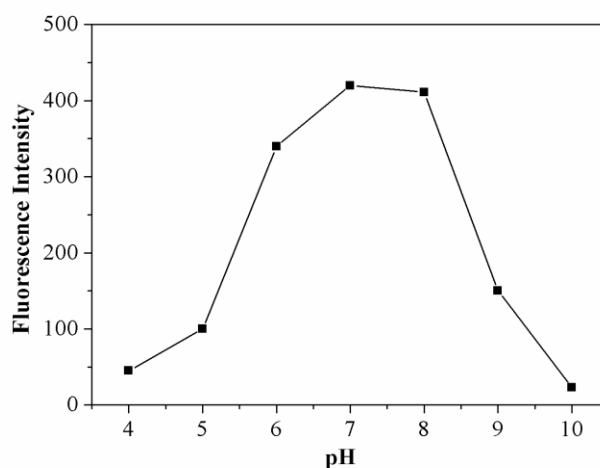

**Figure S5** Effect of pH on fluorescence intensity at 545 nm of **L1** (10  $\mu$ M) in the presence of 10  $\mu$ M  $\text{Cu}^{2+}$  in  $\text{CH}_3\text{CN}/\text{H}_2\text{O}$  solution (1:1, v/v). Excitation was performed at 500 nm.

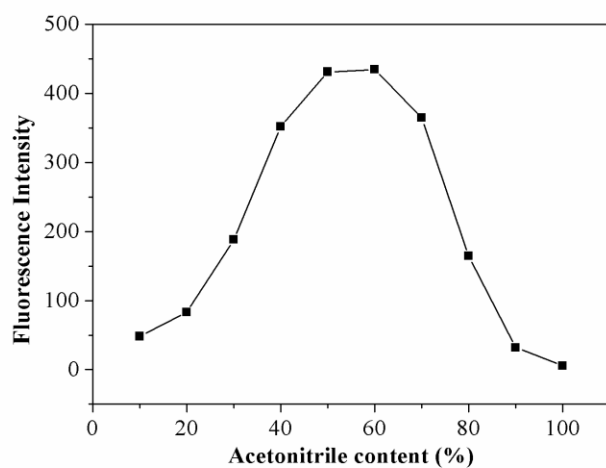

**Figure S6** Effect of acetonitrile content on fluorescence intensity of **L1** (10  $\mu\text{M}$ ) in the presence of 10  $\mu\text{M}$   $\text{Cu}^{2+}$  in  $\text{CH}_3\text{CN}/\text{H}_2\text{O}$  solution. Excitation was performed at 500 nm.

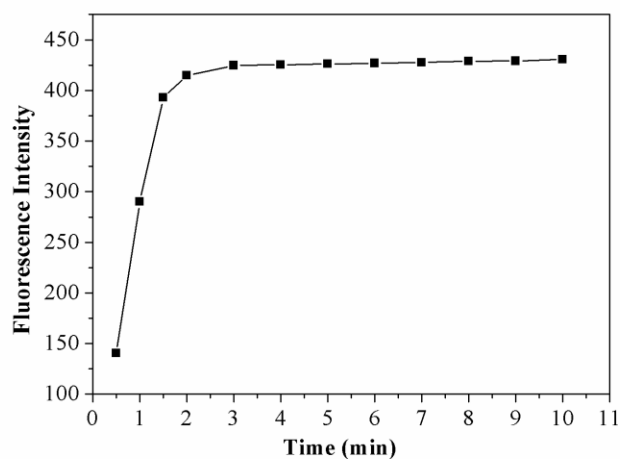

**Figure S7** Time course of the response of **L1** (10  $\mu\text{M}$ ) to 1 equiv. of  $\text{Cu}^{2+}$  in  $\text{CH}_3\text{CN}/\text{H}_2\text{O}$  solution.

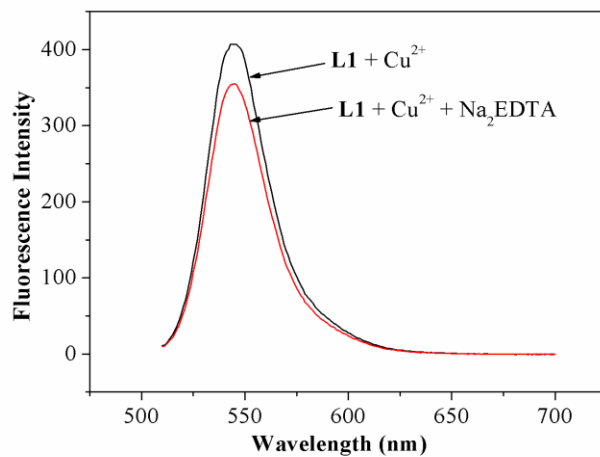

**Figure S8** Fluorescence spectra of **L1** (10  $\mu\text{M}$ ) with addition of 10  $\mu\text{M}$   $\text{Cu}^{2+}$  in the absence and presence of 10 equiv.  $\text{Na}_2\text{EDTA}$  in  $\text{CH}_3\text{CN}/\text{H}_2\text{O}$  solution (1:1, v/v).

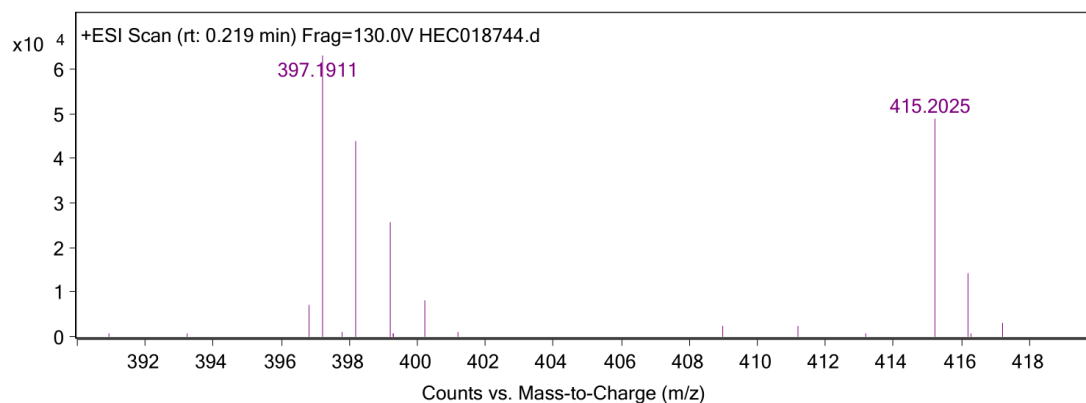

**Figure S9** Mass spectrum for the reaction products of  $\text{Cu}^{2+}$  and **L1** in  $\text{CH}_3\text{CN}/\text{H}_2\text{O}$  solution (1:1, v/v).

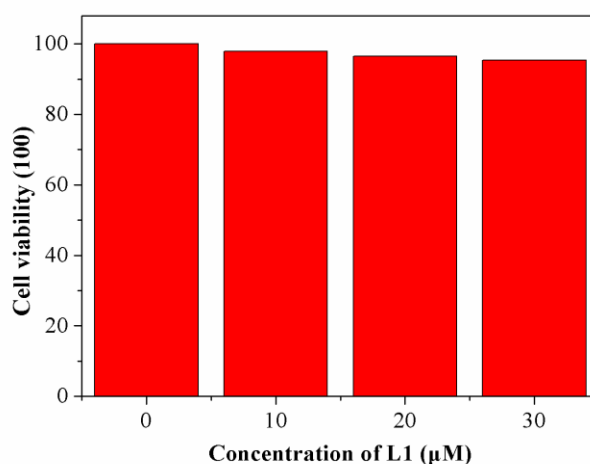

**Figure S10** The viability of MCF7 cells incubated with **L1** of different concentrations.
